# Supplementary material for: Effects of Dietary Exposure to Zearalenone (ZEN) on Carp (Cyprinus carpio L.)
Source: PubMed Central journal article supplement (PMC4591655; doi:10.3390/toxins7093465), 2015-08-26
Supplement: toxins-07-03465-s001.pdf [file toxins-07-03465-s001.pdf]

## Supplementary Information

**Table S1.** Composition of the experimental fish feeds, the values are given as means  $\pm$  SD of two independent determinations of the same feed batch, NFE = nitrogen-free extract.

| <b>Feed Composition</b>                       | <b>Basal feed</b> | <b>Low ZEN</b>   | <b>Medium ZEN</b> | <b>High ZEN</b>  |
|-----------------------------------------------|-------------------|------------------|-------------------|------------------|
| Dry matter [% wet matter]                     | 89.27 $\pm$ 0.70  | 89.80 $\pm$ 0.04 | 89.74 $\pm$ 0.06  | 89.88 $\pm$ 0.06 |
| Crude protein [% dry matter]                  | 46.99 $\pm$ 0.41  | 46.63 $\pm$ 0.32 | 46.35 $\pm$ 0.34  | 46.62 $\pm$ 0.21 |
| Crude lipid [% dry matter]                    | 13.64 $\pm$ 0.22  | 13.99 $\pm$ 0.62 | 14.62 $\pm$ 0.11  | 13.38 $\pm$ 0.06 |
| Crude ash [% dry matter]                      | 6.98 $\pm$ 0.00   | 6.95 $\pm$ 0.11  | 6.83 $\pm$ 0.03   | 7.02 $\pm$ 0.01  |
| NFE [% dry matter]                            | 32.66 $\pm$ 0.63  | 32.43 $\pm$ 0.41 | 32.20 $\pm$ 0.26  | 32.99 $\pm$ 0.16 |
| Gross energy [MJ kg <sup>-1</sup> dry matter] | 22.66 $\pm$ 0.12  | 22.65 $\pm$ 0.04 | 22.56 $\pm$ 0.08  | 22.42 $\pm$ 0.04 |
